# Supplementary material for: HER3-Receptor-Mediated STAT3 Activation Plays a Central Role in Adaptive Resistance toward Vemurafenib in Melanoma
Source: MDPI journal article supplement (doi:10.3390/cancers12123761), 2020-12-14

**Figure 1B**

After transference the blot was cut in different pieces according to size

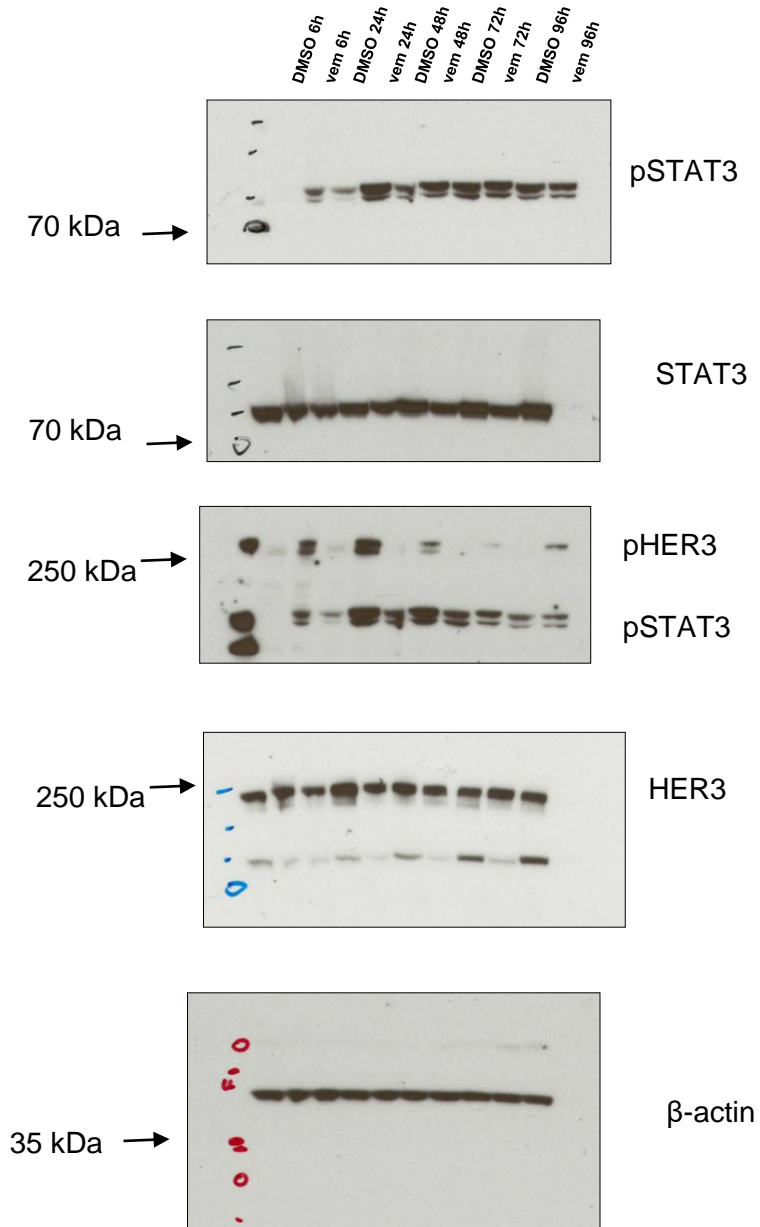

Figure 1D

After transference the blot was cut in different pieces according to size

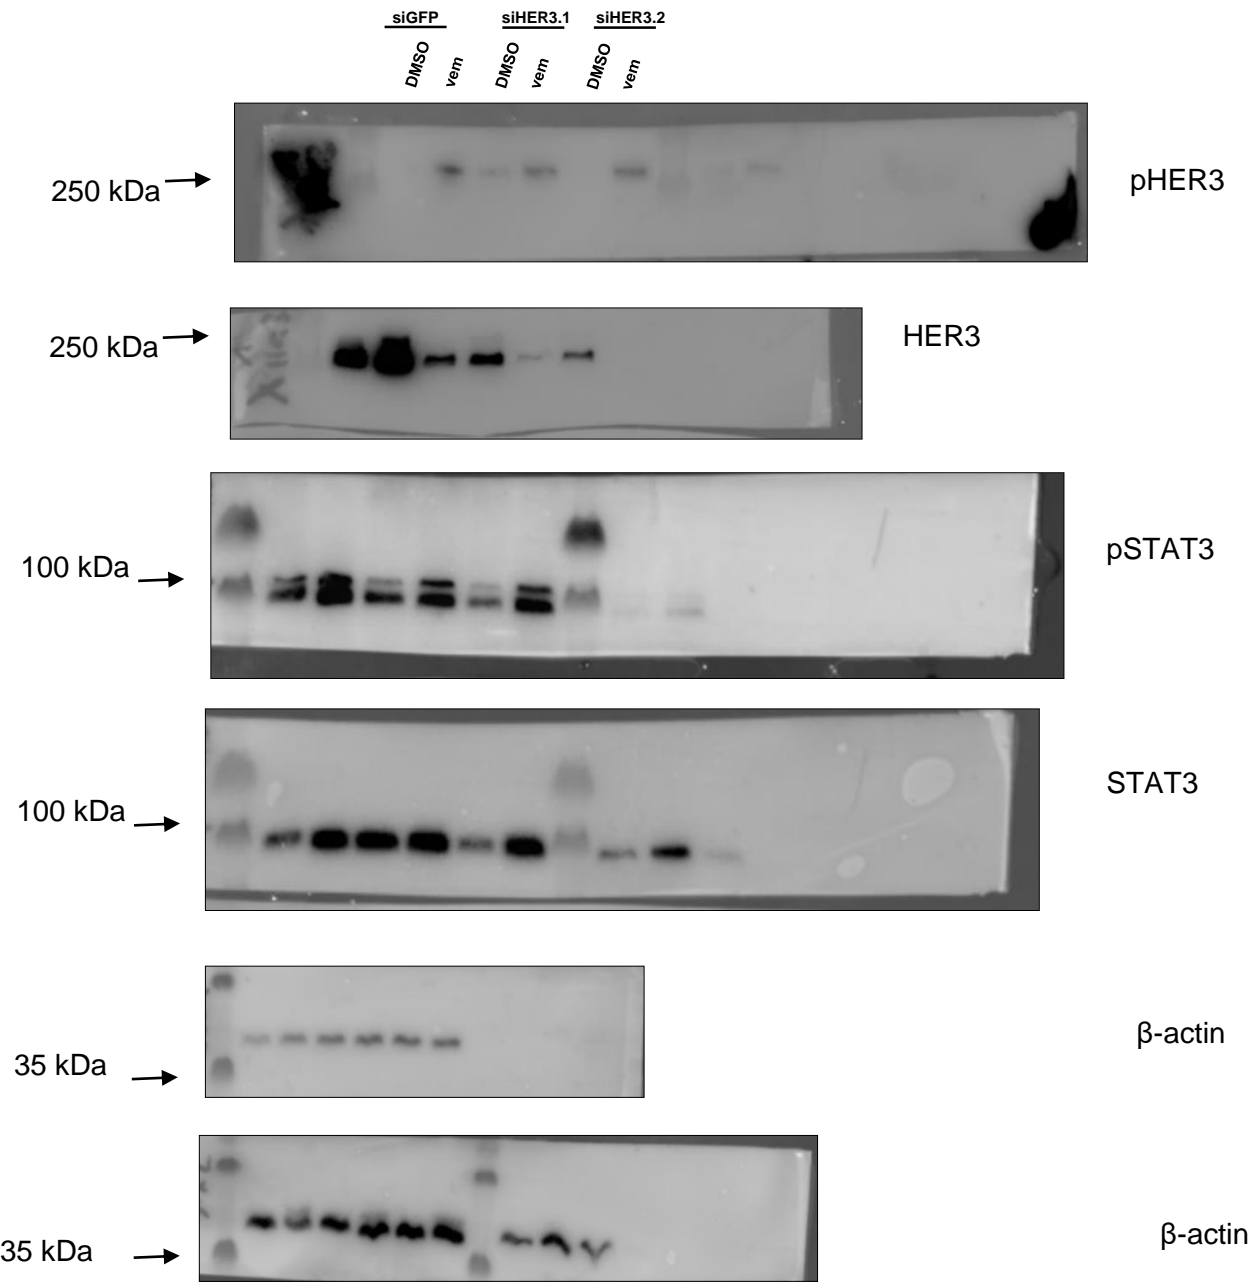

**Figure 1E**

After transference the blot was cut in different pieces according to size

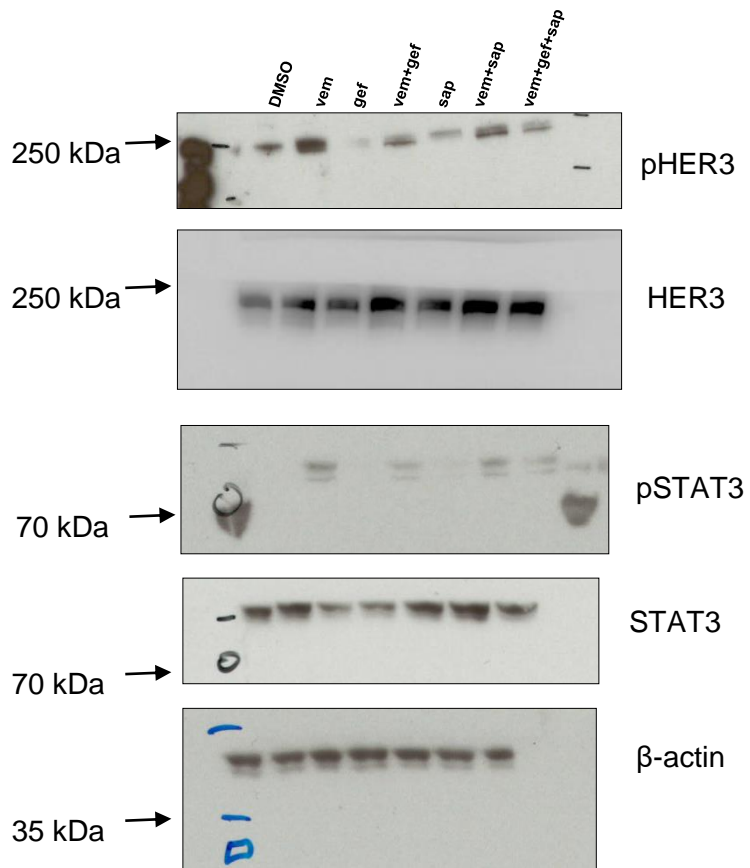

**Figure 3C left**

After transference the blot was cut in different pieces according to size

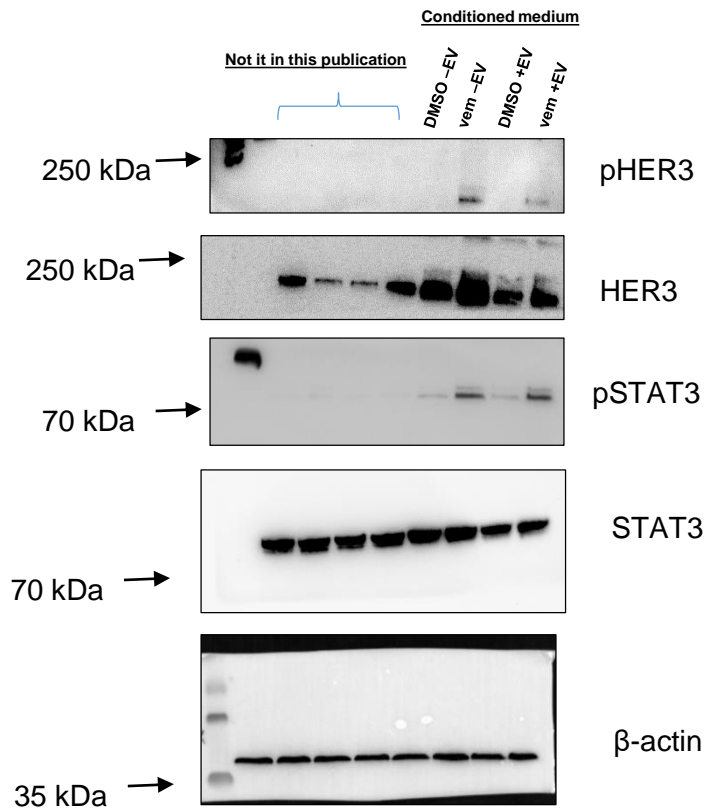

**Figure 3C right**

After transference the blot was cut in different pieces according to size

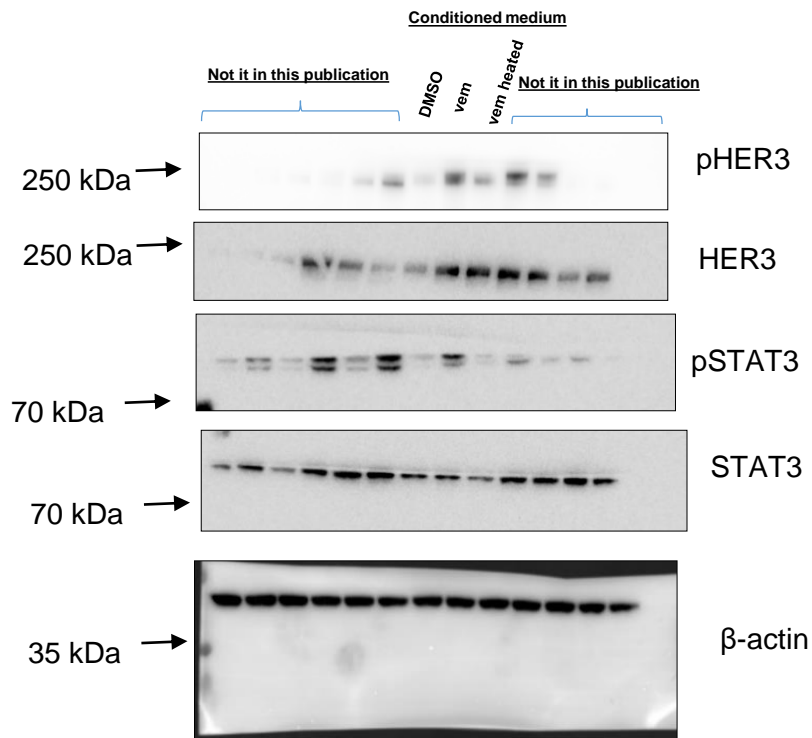

# Figure 3E

After transference the blot was cut in different pieces according to size

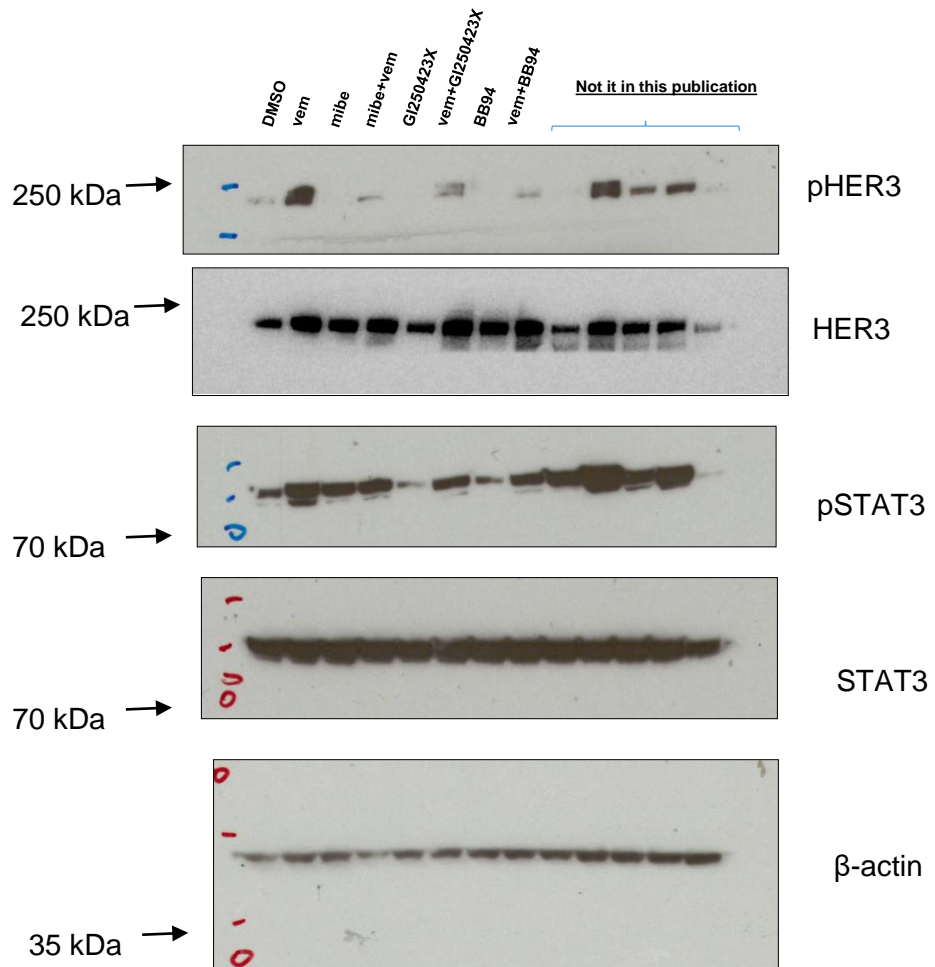

Figure 4C

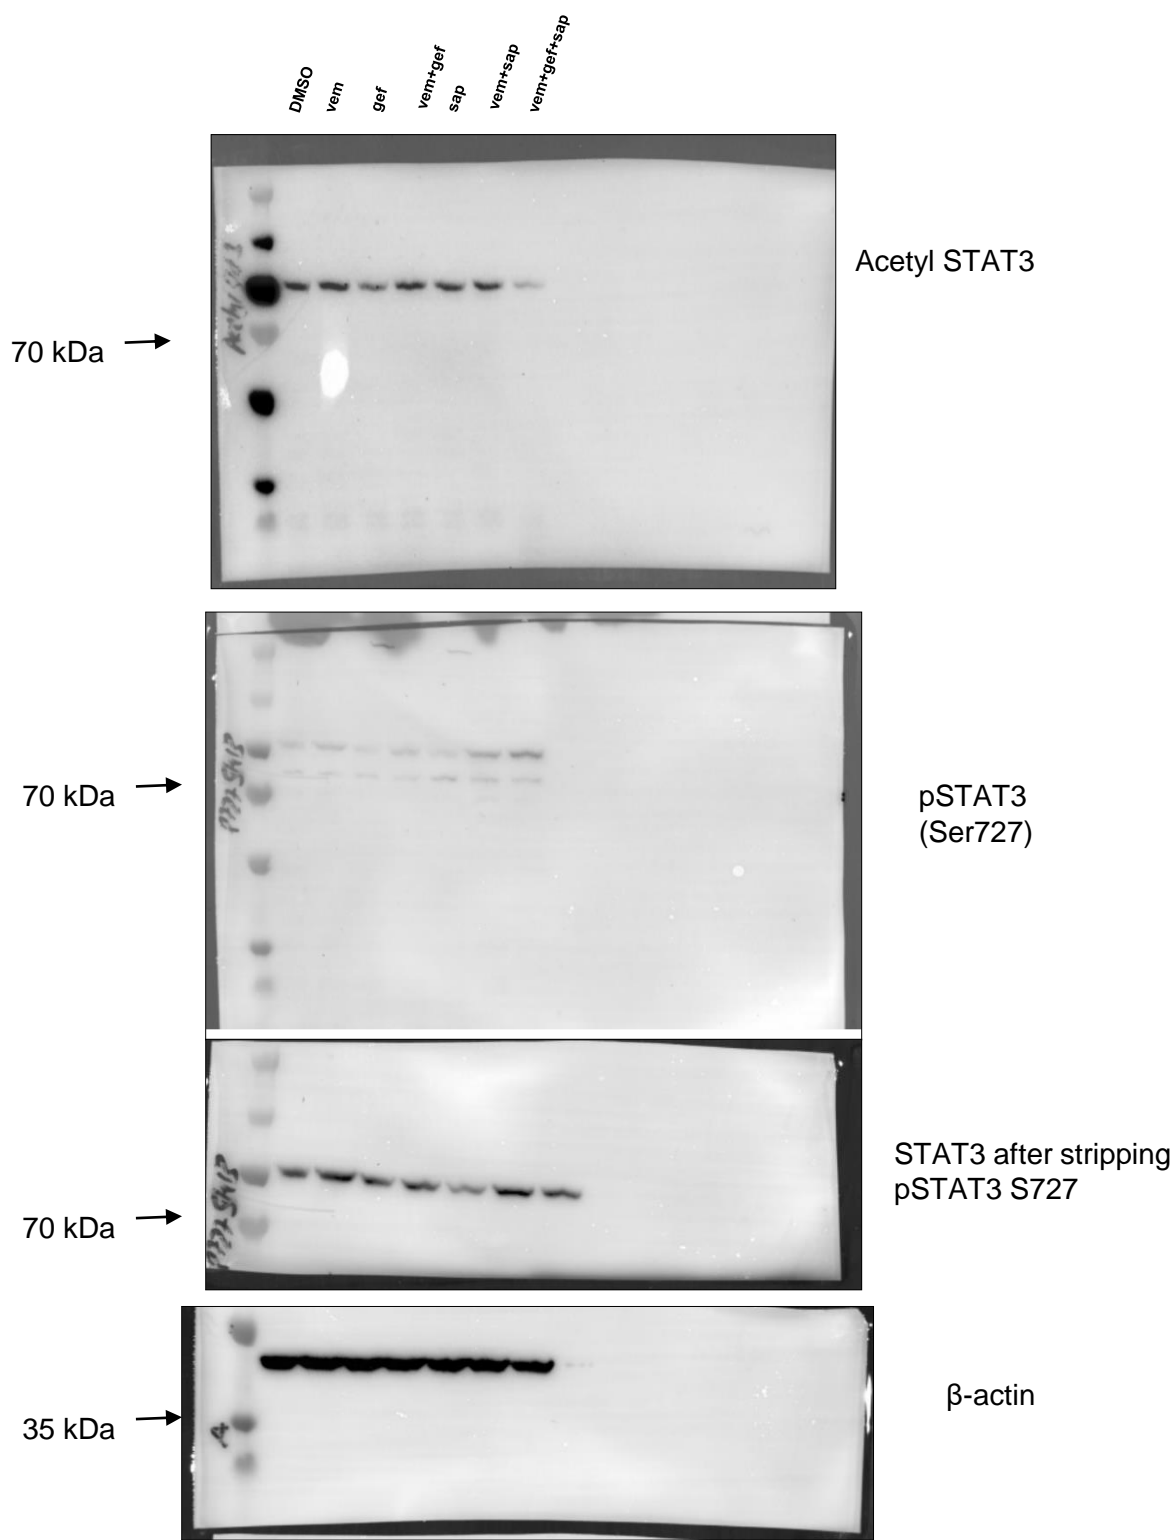

Figure 4D

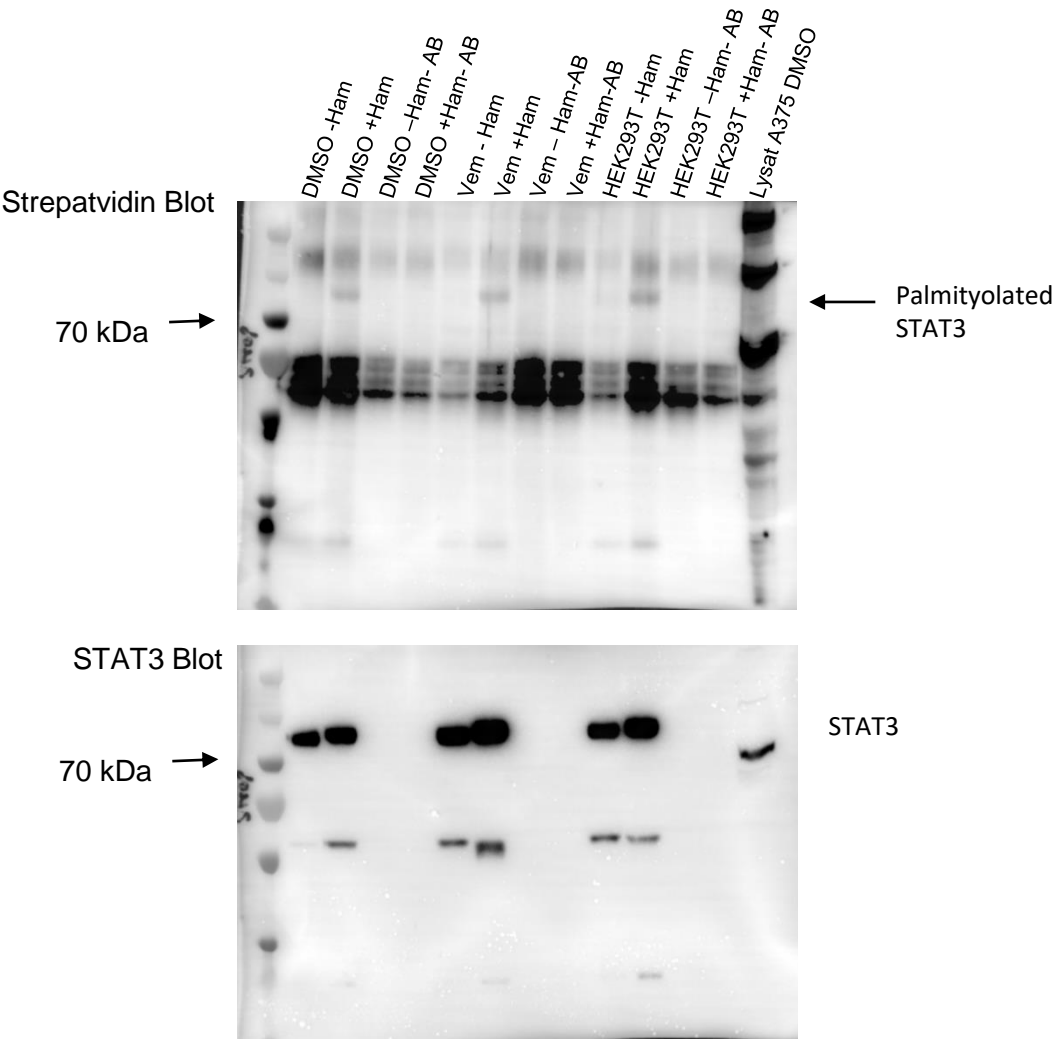



**Suppl. Fig 1B**

After transference the blot was cut in different pieces according to size

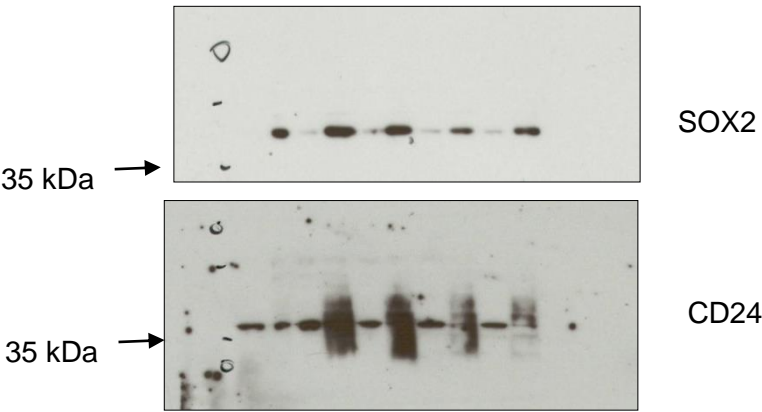

## Suppl. Fig1C

After transference the blot was cut in different pieces according to size

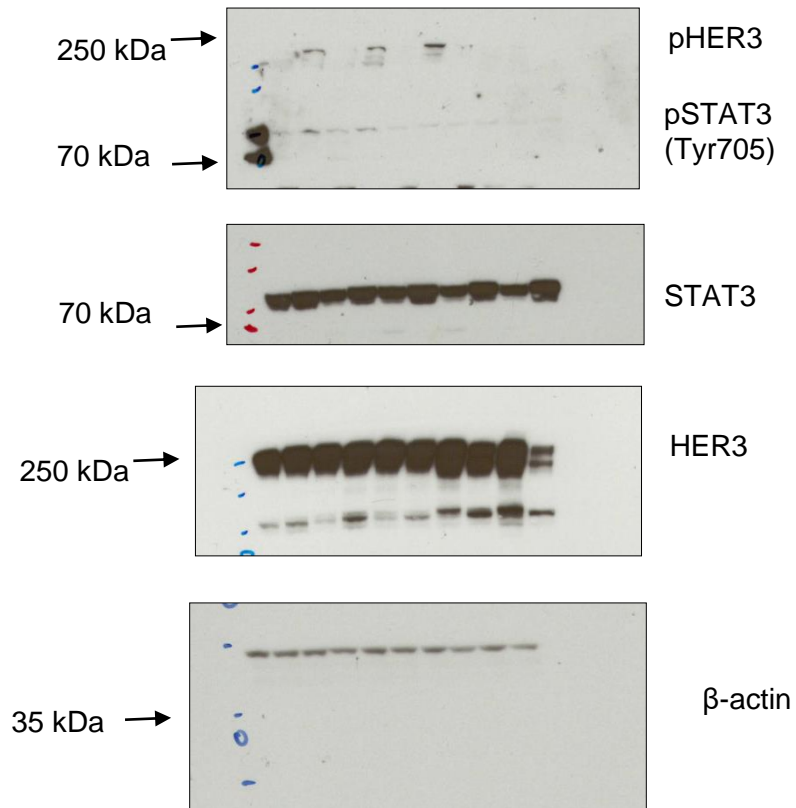

Suppl. Fig1D

After transfere the blot was cut in different pieces according to size

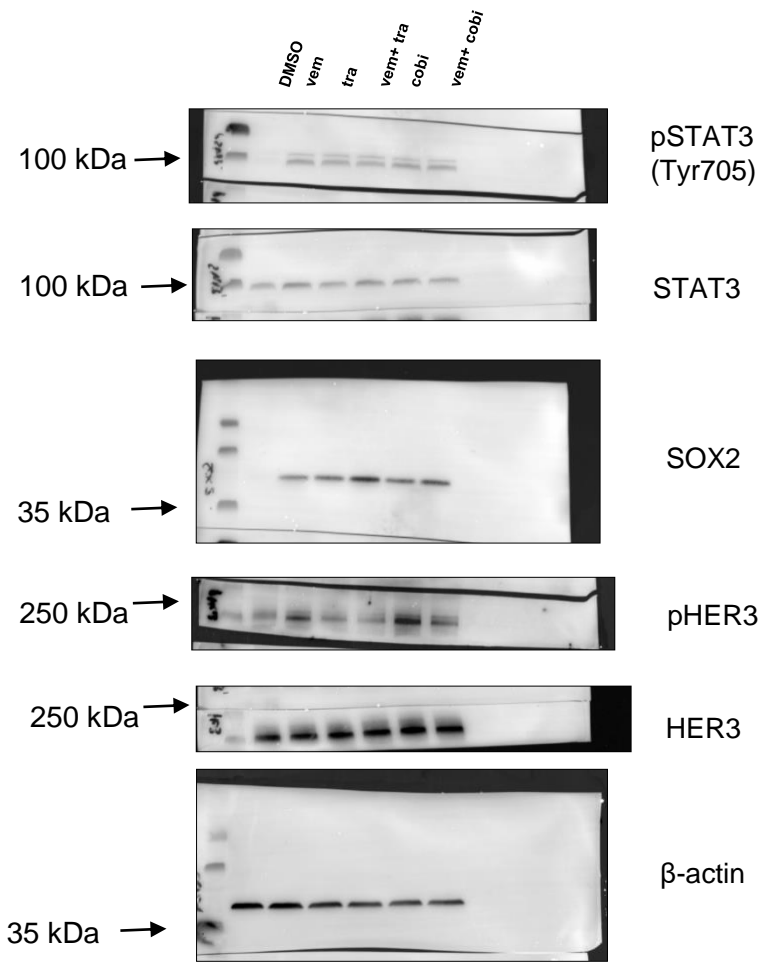

Blots additionally to 1E quantified for Fig. 1F

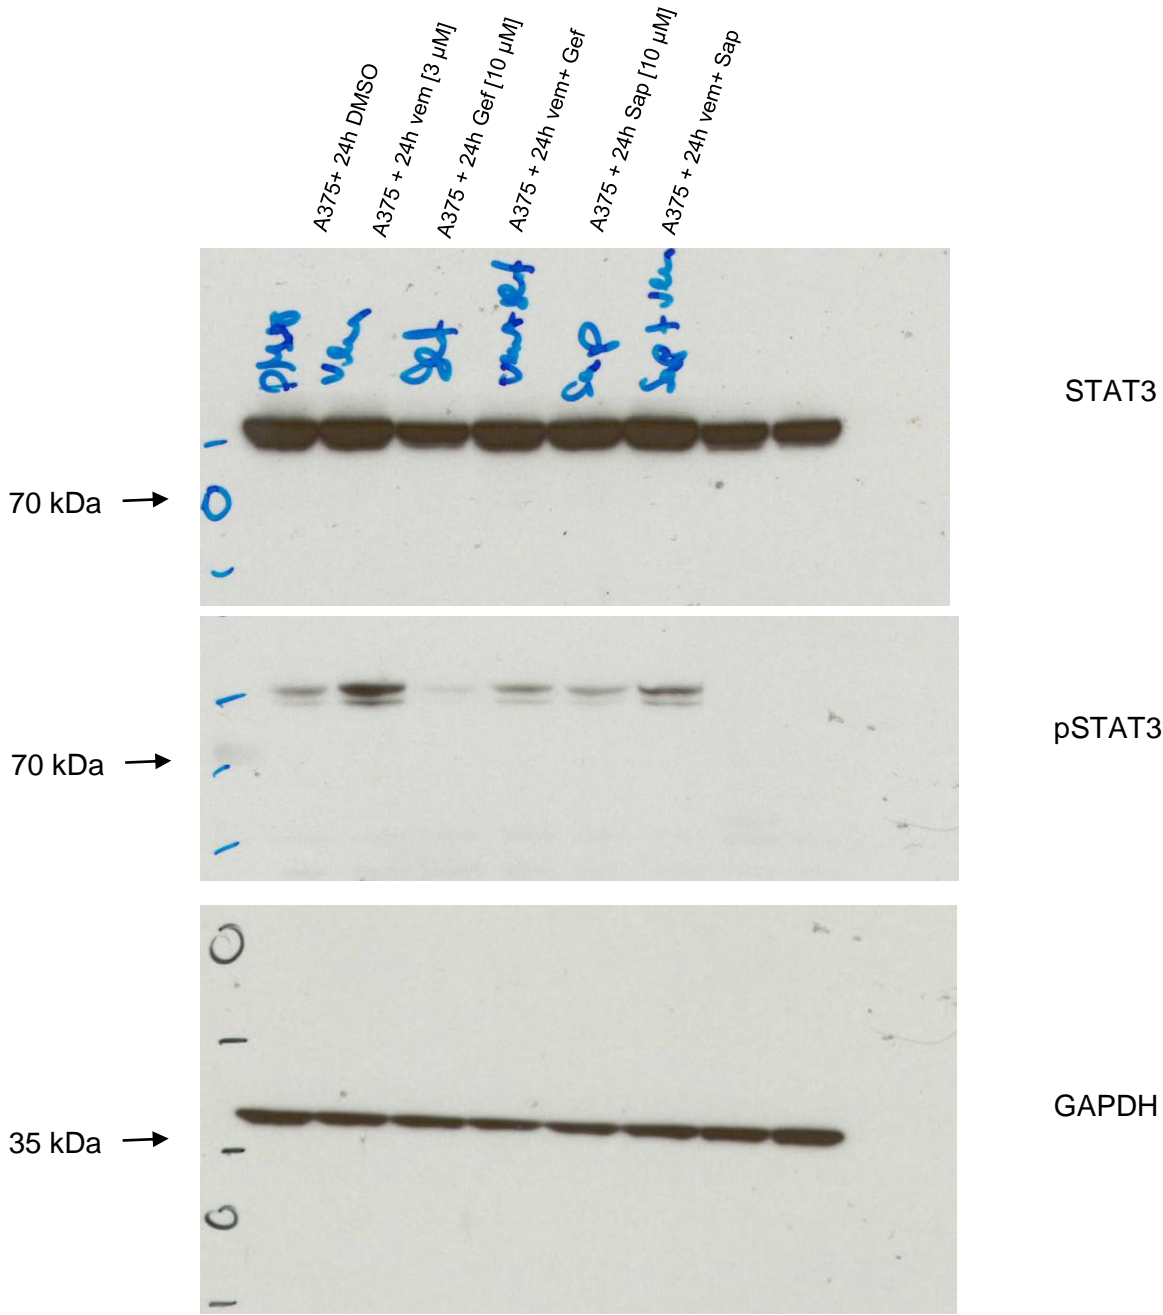

### Blots additionally quantified for Fig. 1F

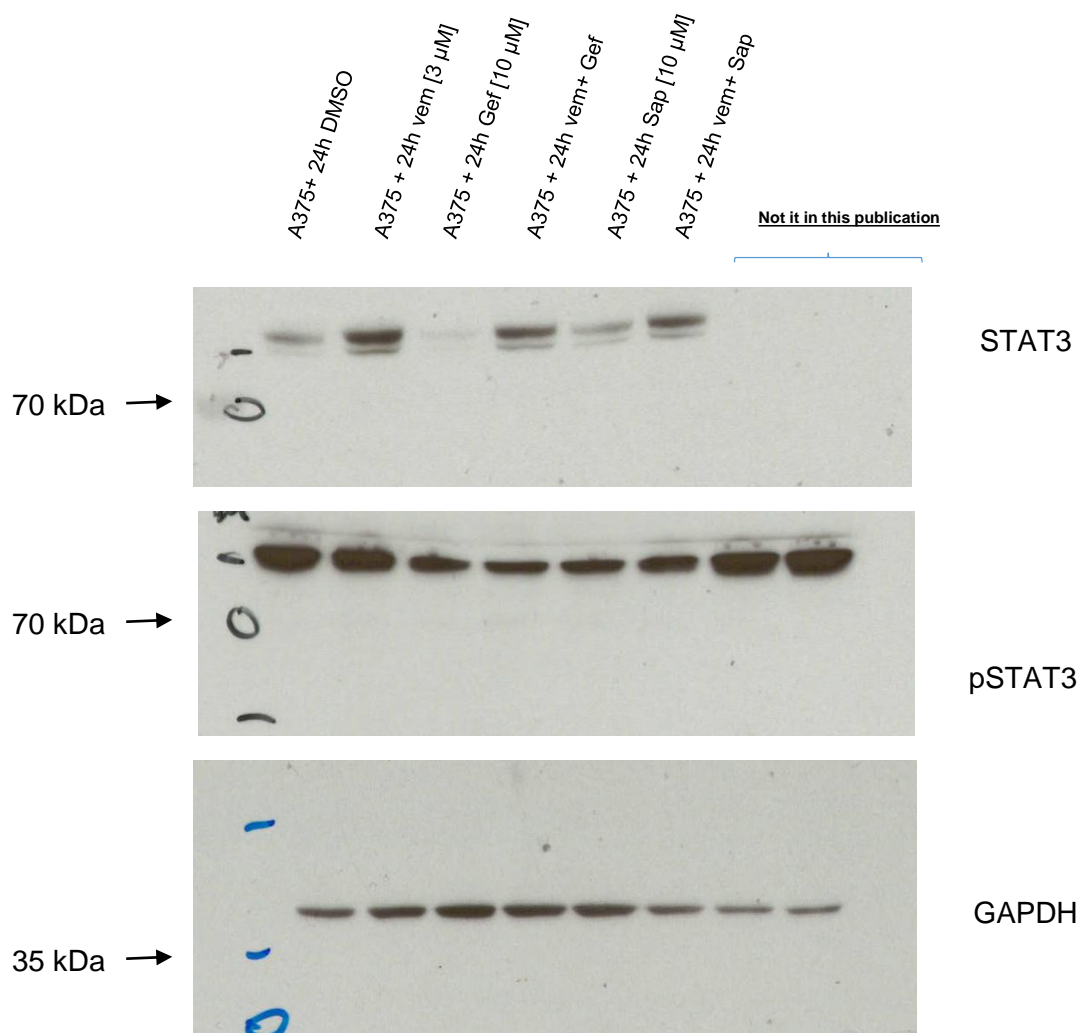

Blots additionally quantified for Fig. 1F

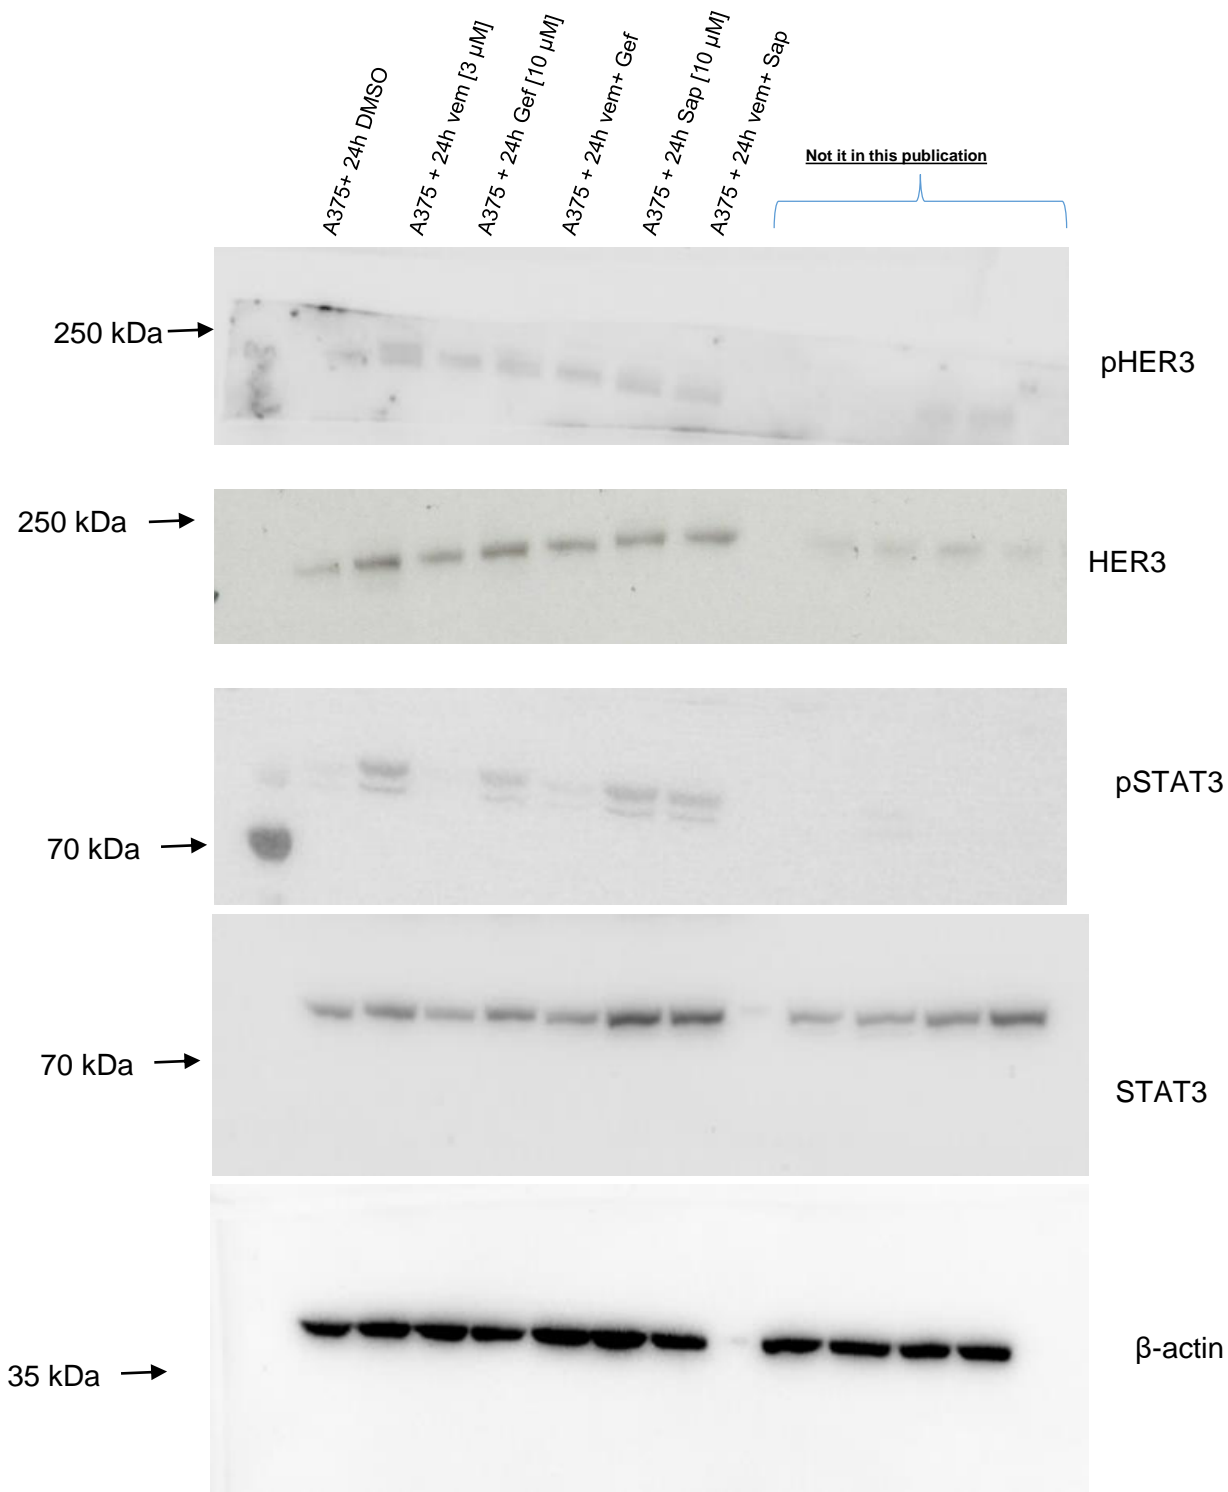

### Blots additionally quantified for Fig. 1F

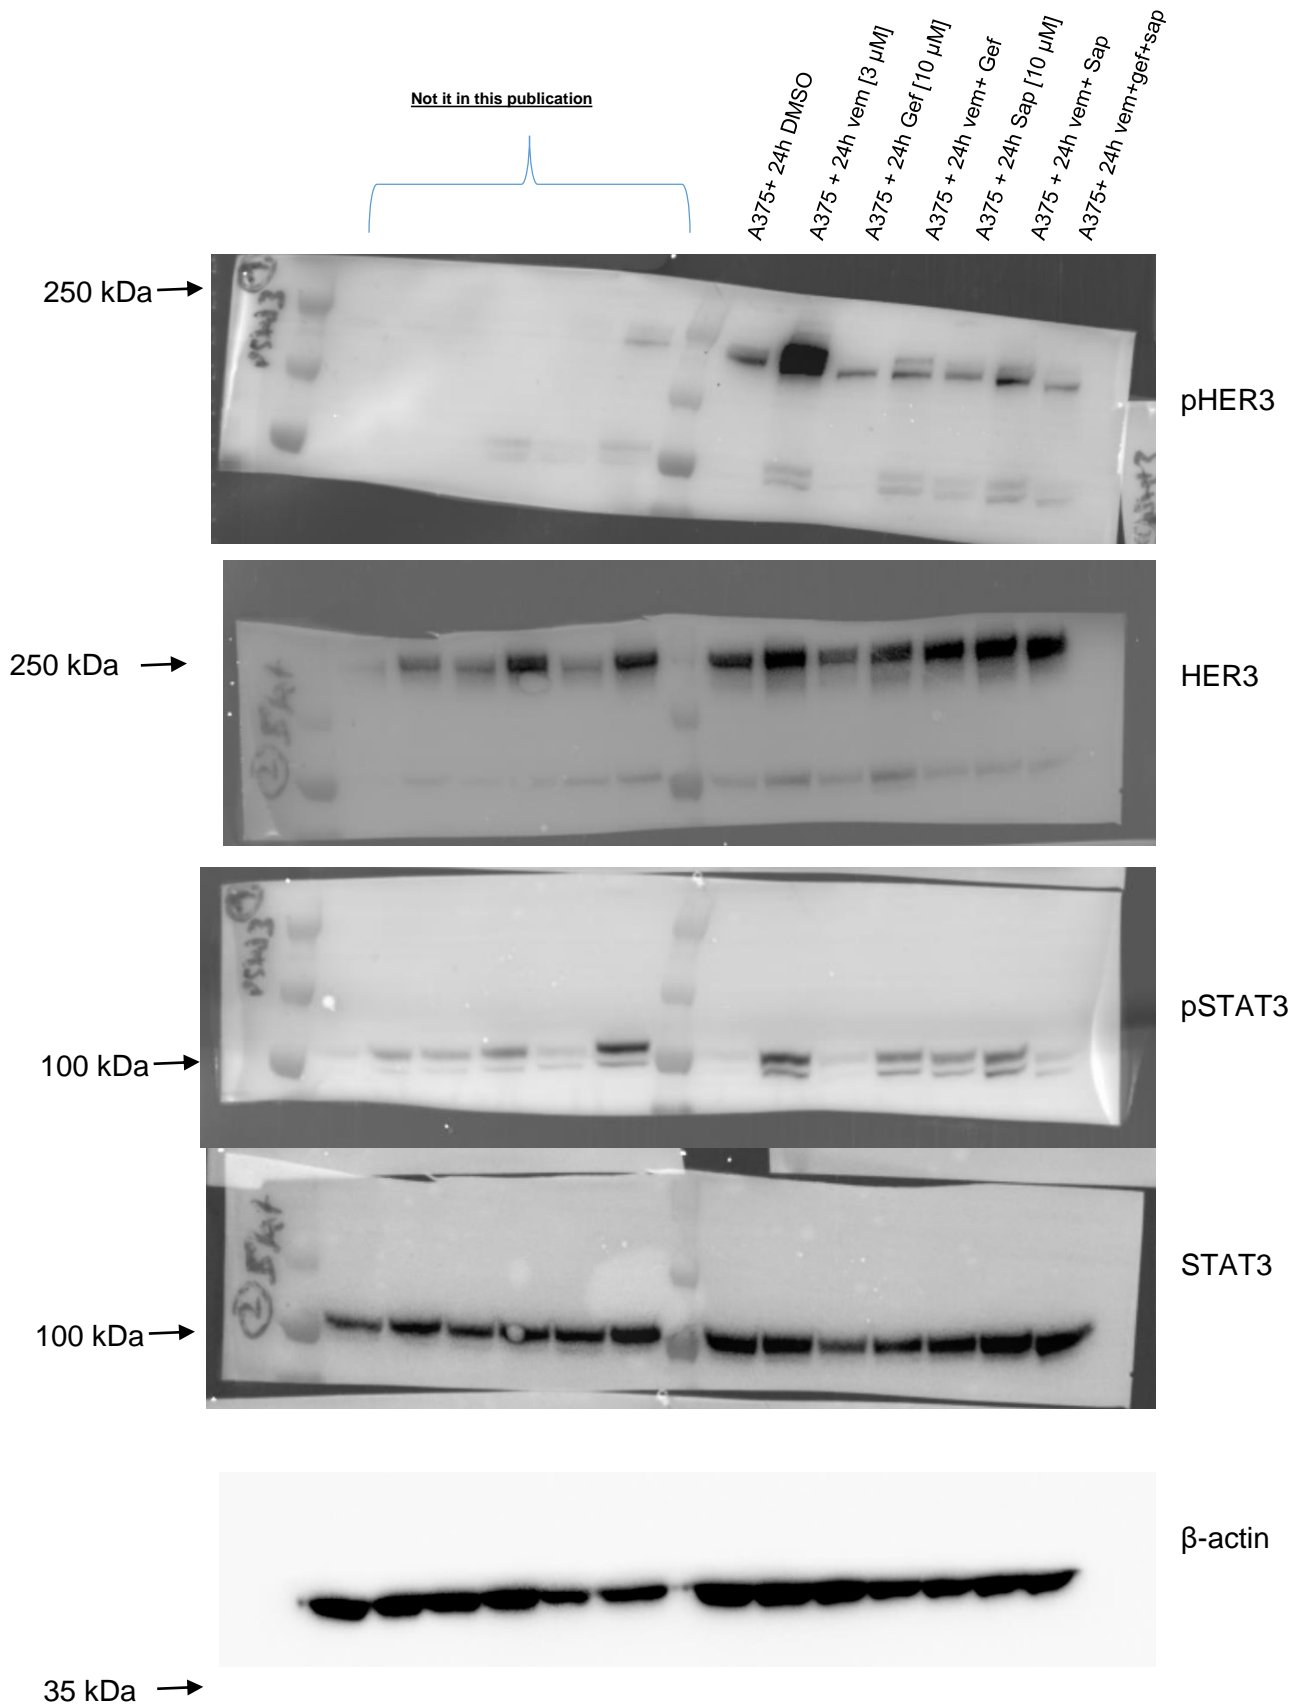

Supplement: s1 [file s1]
